# 1                    **Antenatal care coverage in a low-resource setting:** 2                    **estimations from the Birhan Cohort**

3 Clara Pons-Duran<sup>1\*</sup>, Delayehu Bekele<sup>1,2</sup>, Sebastien Haneuse<sup>3</sup>, Bezawit Mesfin Hunegnaw<sup>4</sup>,  
4 Kassahun Alemu<sup>5</sup>, Munir Kassa<sup>6</sup>, Yifru Berhan<sup>7</sup>, Frederick G.B. Goddard<sup>1</sup>, Lisanu Tadesse<sup>8</sup>,  
5 Grace J. Chan<sup>1,4,9</sup>

6  
7 <sup>1</sup> Department of Epidemiology, Harvard T.H. Chan School of Public Health, Boston, MA, USA

8 <sup>2</sup> Department of Obstetrics and Gynecology, St. Paul's Hospital Millennium Medical College,  
9 Addis Ababa, Ethiopia

10 <sup>3</sup> Department of Biostatistics, Harvard T.H. Chan School of Public Health, Boston, MA, USA

11 <sup>4</sup> Department of Pediatrics and Child Health, St. Paul's Hospital Millennium Medical College,  
12 Addis Ababa, Ethiopia

13 <sup>5</sup> Department of Epidemiology and Biostatistics, Institute of Public Health, College of Medicine  
14 and Health Sciences, University of Gondar, Gondar, Ethiopia

15 <sup>6</sup> Ministry of Health, Addis Ababa, Ethiopia

16 <sup>7</sup> St. Paul's Hospital Millennium Medical College, Addis Ababa, Ethiopia

17 <sup>8</sup> HaSET Maternal and Child Health Research Program, Addis Ababa, Ethiopia

18 <sup>9</sup> Division of Medicine Critical Care, Boston Children's Hospital, Department of Pediatrics,  
19 Harvard Medical School, Boston, MA, USA.

20 \*Corresponding author: [cponsduran@hsph.harvard.edu](mailto:cponsduran@hsph.harvard.edu) (CPD)

## 21 **Abstract**

22 Antenatal care (ANC) coverage estimates commonly rely on self-reported data, which may carry  
23 biases. Leveraging prospectively collected longitudinal data, this study aimed to estimate the  
24 coverage of ANC, minimizing assumptions and biases due to self-reported information and  
25 describing retention patterns in ANC in rural Amhara, Ethiopia. This is a cohort study using data  
26 from the Birhan Health and Demographic Surveillance System and its nested pregnancy and  
27 birth cohort, the Birhan Cohort. The study population were women enrolled and followed during  
28 pregnancy between December 2018 and April 2020. ANC visits were measured by prospective  
29 facility chart abstraction and self-report at enrollment. The primary study outcomes were the  
30 total number of ANC visits attended during pregnancy and the coverage of at least one, four and  
31 eight ANC visits. Additionally, we estimated ANC retention patterns. We included 2069 women,  
32 of which 150 (7.2%) women enrolled <13 weeks of gestation with complete prospective facility  
33 reporting. Among 150 women, ANC coverage of at least one visit was 97.3%, whereas coverage  
34 of four visits or more was 34.0%. Among all women, coverage of one ANC visit was 92.3%,  
35 while coverage of four or more visits was 28.8%. No women were found to have attended eight  
36 or more ANC visits. On retention in care, 70.3% of participants who had an ANC visit between  
37 weeks 28 and <36 of gestation did not return for a subsequent visit. Despite the high proportion  
38 of pregnant women who accessed ANC at least once in our study area, the coverage of four visits  
39 remains low. Further efforts are needed to enhance access to more ANC visits, retain women in  
40 care, and adhere to the most recent National ANC guideline. It is essential to identify the factors  
41 that lead a large proportion of women to discontinue ANC follow-up.

## 42 **Introduction**

43 Antenatal care (ANC) coverage is an indicator of utilization of essential health services for  
44 pregnant women, defined as the proportion of women with a birth in a certain period who  
45 attended a specific number of ANC visits for their most recent pregnancy [1, 2]. ANC provides  
46 an opportunity to anticipate complications, deliver preventive strategies, and ultimately identify  
47 population groups at high risk of experiencing adverse events during pregnancy to prevent them  
48 [1]. ANC could contribute to reducing maternal and neonatal mortality figures and improve other  
49 maternal and newborn health outcomes [3, 4]. Ethiopia is the second most populous country in  
50 Africa, with the fastest growing economy on the continent [5]. Despite an increasing trend in  
51 ANC coverage over the past two decades [6], the coverage of at least one ANC visit during  
52 pregnancy was lower than 75%, and the proportion of women who remain in care for up to four  
53 or more visits was 43% in 2019 [7]. These country estimates are far from the national target of  
54 achieving 81% coverage of four or more ANC visits by 2025 [8]. Recently in early 2022, the  
55 National ANC guideline was updated, and now a minimum of eight ANC visits during  
56 pregnancy are recommended [9].

57 There is evidence suggesting that self-reports of ANC use are largely biased when coverage is  
58 low and those self-reports have low specificity [10]. This may be due to long recall periods,  
59 social desirability bias, or poor understanding of what constitutes ANC. In Ethiopia and other  
60 low-resource settings, there is a lack of studies that validate self-reported data about ANC use,  
61 and the reliability of those estimates is unknown. Further, most studies on ANC coverage  
62 conducted in Ethiopia are cross-sectional [11-16], and to our knowledge, there is no evidence of  
63 ANC estimates based on longitudinal prospective data or direct observation. In addition to the  
64 potential biases that self-reported data may imply, cross-sectional studies make it difficult to  
65 investigate retention in care patterns and timing of the recommended ANC visits.

66 Quality and accurate estimates of ANC coverage from different regions in Ethiopia are  
67 fundamental to understanding the level of ANC use at local level and to tracking implementation  
68 progress of the recently launched National ANC guideline [9]. Reliable estimates are needed to  
69 inform the design and delivery of interventions to enhance ANC attendance. This study presents  
70 an opportunity to leverage prospectively collected longitudinal data from a maternal and child  
71 cohort. We aimed to estimate the coverage of ANC using an approach that minimizes  
72 assumptions and biases from self-reported information and to describe retention patterns in ANC  
73 in rural Amhara, Ethiopia.

74

## 75 **Methods**

### 76 **Study design and setting**

77 We conducted a cohort study in the Birhan field site, including 16 villages in Amhara Region,  
78 Ethiopia, covering a mid-year population of 77,766, to estimate morbidity and mortality  
79 outcomes among 17,108 women of reproductive age and 8,554 children under-five with house-  
80 to-house surveillance every three months. The field site includes a health and demographic  
81 surveillance system (HDSS), the Birhan HDSS, a platform for community and facility-based  
82 research and training that was established in 2018, with a focus on maternal and child health  
83 [17]. Nested in the site is an open pregnancy and birth cohort, the Birhan Cohort, that enrolls  
84 approximately 2,000 pregnant women and their newborns per year with rigorous longitudinal  
85 follow-up over the first two years of life and household data linked with health facility  
86 information [18]. The catchment area is rural and semi-urban, covers both highland and lowland  
87 areas, and includes two different districts, Angolela Tera, and Kewet/Shewa Robit.

88 We used data from the Birhan HDSS and Birhan Cohort to estimate coverage of ANC-related  
89 indicators [17, 18]. The HDSS provides estimates and trends of health and demographic  
90 outcomes including morbidity among women of reproductive age and children under two years  
91 and births, deaths, marriages, and migration in the entire population [17]. The pregnancy and  
92 birth cohort, generates evidence on pregnancy, birth, and child outcomes using clinical and  
93 epidemiological data at both the community and health facility level [18].

## 94 **Study population**

95 We used data of women enrolled and followed until delivery in the Birhan Cohort, both at the  
96 facility and community level, between December 2018 and April 2020. We excluded participants  
97 with abortions or miscarriages and implausible documented gestational ages at enrollment ( $\leq 0$   
98 weeks or  $\geq 46$  weeks) and/or delivery ( $< 28$  weeks or  $\geq 46$  weeks). Gestational age was estimated  
99 using the best available method from ultrasound measurements, date of last menstrual period,  
100 fundal height, and maternal recall of gestational age in months [19].

## 101 **Study outcomes**

102 ANC visits were measured by prospective facility chart abstraction from enrollment and self-  
103 report at enrollment. In a subgroup of women, retrospective facility chart abstraction was done.  
104 We defined ANC coverage as the proportion of women enrolled in the Birhan Cohort who  
105 attended ANC visits during pregnancy. The primary study outcomes were the total number of  
106 ANC visits attended during pregnancy and the coverage of at least one, four, and eight ANC  
107 visits.  
108 Secondary study outcomes included retention in care, defined as the continued engagement in  
109 facility ANC. We defined those secondary outcomes as the proportion of study participants in  
110 care at different gestational age times (ANC1 window,  $< 16$  weeks; ANC2 window, 16 -  $< 28$

111 weeks; ANC3 window, 28 - <36 weeks; and ANC4 window,  $\geq 36$  weeks) and the proportion of  
112 participants in care who were lost after each of those time windows.

## 113 **Analysis**

114 We estimated ANC coverage by adding the number of prospectively recorded visits from  
115 enrollment to the number of self-reported visits at enrollment. Since study participants were  
116 enrolled at different times during pregnancy, we estimated ANC coverage among the cohort of  
117 women who enrolled <13 weeks where most of the ANC visits were recorded prospectively to  
118 minimize recall bias. In addition, we also estimated ANC coverage for the entire population. For  
119 coverage outcomes, descriptive statistics were undertaken; frequencies, proportions, and Agresti-  
120 Coull 95% confidence intervals (CI)[20] were reported for dichotomous outcomes, while median  
121 and interquartile range (IQR) were used to report continuous outcomes.

122 We assessed the quality and reliability of self-reports by comparing the counts of self-reported  
123 visits at enrollment and the retrospectively collected visits from charts for a subset of  
124 participants. More details of this analysis can be found in the S1 File.

125 To assess comparability between the study subsample (women enrolled <13 weeks) and the  
126 remaining cohort participants, we compared the socio-demographic characteristics and obstetric  
127 history of participants enrolled <13 weeks and  $\geq 13$  weeks of gestation using descriptive statistics  
128 and chi-squared tests, t-test, and Fisher exact tests. Further, women enrolled in the cohort at  
129 different gestation age weeks were compared in terms of access to ANC services during second  
130 and third trimesters using frequencies and proportions of attendance to at least one ANC visit at  
131 different time windows.

132 To investigate secondary study outcomes, the proportion of participants in care during the  
133 window times for the different ANC visits was represented in an alluvial plot. Proportions of

134 women in care during ANC1 to ANC4 window times were estimated for the cohort of women  
135 enrolled <13 weeks. To calculate retention, the proportion of participants lost after each ANC  
136 visit was estimated using the total number of women in care for that visit as a denominator. The  
137 proportion of women lost after ANC3 did not include those who delivered before gestational  
138 week 36. Descriptive statistics were undertaken, with frequencies, proportions, and Agresti-Coull  
139 95% CI reported [20].

140 To investigate the potential selection bias due to loss to follow-up, we conducted a sensitivity  
141 analysis estimating coverage of ANC in the missing data under several scenarios each of which  
142 assume that ANC coverage among lost women would be lower than that of women followed  
143 until delivery. Specifically, for the outcome ‘at least one ANC visit’, we assumed that all women  
144 who did not have a visit before being lost never had any ANC visits. For the outcome ‘four ANC  
145 visits or more’, we considered three scenarios where women lost to follow-up had ANC  
146 coverage in a range from 0% to 90% of the ANC coverage estimated among women who were  
147 not lost to follow-up based on the number of visits attended when they were lost. More details of  
148 these scenarios can be found in the S2 File.

149 Analysis was conducted using R version 4.2.2, and Stata version 17.

## 150 **Ethical considerations**

151 Ethical clearance was obtained from the Ethics Review Board (IRB) of Saint Paul’s Hospital  
152 Millennium Medical college, (Addis Ababa, Ethiopia) [PM23/274], Boston Children’s Hospital  
153 (Boston, United States) [IRB-P00028224], and Harvard T.H. Chan School of Public Health  
154 (Boston, United states) [IRB19-0991]. Signed informed consent was obtained from  
155 all participants.

156 Authors had no access to participants' identifiable information during or after data collection  
157 unless they were involved in field data collection activities and data quality assurance. All study  
158 procedures were followed per protocol and participants confidentiality and anonymity was  
159 ensured.

160

## 161 Results

162 A total of 2303 women were enrolled in the MCH cohort and delivered during the time frame of  
163 the study. We excluded 95 (4.1%) women due to pregnancy losses (62, 2.7%) and implausible  
164 gestational ages (33, 1.4%). Among the remaining 2208 women, 139 (6.3%) were lost to follow-  
165 up; 2069 women were included in the analysis, of which 150 (7.2%) were enrolled in the cohort  
166 before 13 weeks of gestation. The participant characteristics for the groups of women enrolled  
167 <13 weeks and  $\geq$ 13 weeks of gestation were similar (Table 1). There were no statistically  
168 significant differences observed for age, residency, socio-economics, obstetric history, and  
169 timing of ANC visits (see S3 File).

170 **Table 1. Characteristics of the study population and by gestational age at enrollment**

| Variables                       | Enrolled <13 weeks<br>(N=150) |            | Enrolled $\geq$ 13 weeks<br>(N=1919) |            | p-value | Total<br>(N=2069) |            |
|---------------------------------|-------------------------------|------------|--------------------------------------|------------|---------|-------------------|------------|
|                                 | N                             | mean (SD)  | N                                    | mean (SD)  |         | N                 | mean (SD)  |
| Age at<br>conception<br>(years) | 150                           | 27.9 (6.4) | 1919                                 | 27.0 (6.1) | 0.12    | 2069              | 27.1 (6.1) |



|                                                   | 150      | 66.2 (57.6)  | 1909     | 68.1 (54.7)  | 0.69           | 2059     | 68.0 (54.9)  |
|---------------------------------------------------|----------|--------------|----------|--------------|----------------|----------|--------------|
|                                                   | <b>N</b> | <b>n (%)</b> | <b>N</b> | <b>n (%)</b> | <b>p-value</b> | <b>N</b> | <b>n (%)</b> |
| Walking time to nearest health facility (minutes) | 150      |              | 1915     |              | 0.44           | 2065     |              |
| Woreda                                            |          |              |          |              |                |          |              |
| Angolela Tera                                     |          | 62 (41.3)    |          | 861 (45.0)   |                |          | 923 (44.7)   |
| Kewet                                             |          | 88 (58.7)    |          | 1054 (55.0)  |                |          | 1142 (55.3)  |
| Cannot read and write                             | 150      | 72 (48.0)    | 1914     | 866 (45.2)   | 0.57           | 2064     | 938 (45.4)   |
| Wealth index                                      | 150      |              | 1919     |              | 0.38           | 2069     |              |
| 1 <sup>st</sup> quintile (the wealthiest)         |          | 36 (24.0)    |          | 391 (20.4)   |                |          | 427 (20.6)   |
| 2 <sup>nd</sup> quintile                          |          | 28 (18.7)    |          | 447 (23.3)   |                |          | 475 (23.0)   |
| 3 <sup>rd</sup> quintile                          |          | 33 (22.0)    |          | 386 (20.1)   |                |          | 419 (20.3)   |
| 4 <sup>th</sup> quintile                          |          | 30 (20.0)    |          | 328 (17.1)   |                |          | 358 (17.3)   |
| 5 <sup>th</sup> quintile (the least wealthy)      |          | 23 (15.3)    |          | 367 (19.1)   |                |          | 390 (18.8)   |
| Ethnicity                                         | 150      |              | 1915     |              | 1              | 2065     |              |
| Amhara                                            |          | 138 (92.0)   |          | 1748 (91.3)  |                |          | 1886 (91.3)  |
| Oromo                                             |          | 8 (5.3)      |          | 113 (5.9)    |                |          | 121 (5.9)    |
| Other                                             |          | 4 (2.7)      |          | 54 (2.8)     |                |          | 58 (2.8)     |
| Primiparous                                       | 150      | 42 (28.0)    | 1919     | 605 (31.5)   | 0.42           | 2069     | 647 (31.3)   |
| History of stillbirth                             | 150      | 13 (8.7)     | 1919     | 97 (5.1)     | 0.09           | 2069     | 110 (5.3)    |

|                          |     |         |      |          |      |      |          |
|--------------------------|-----|---------|------|----------|------|------|----------|
| History of preterm birth | 150 | 6 (4.0) | 1919 | 36 (1.9) | 0.12 | 2069 | 42 (2.0) |
|--------------------------|-----|---------|------|----------|------|------|----------|

171 *Note: SD – standard deviation*

172 Among the 150 women who enrolled in the cohort before 13 weeks of gestation, 97.3% (95%CI  
 173 93.1% - 99.2%) had at least one ANC visit, whereas only 34.0% (95%CI 26.9% - 41.9%) of the  
 174 women had four or more ANC visits (Table 2). No women attended eight or more ANC visits.  
 175 Almost a third of women (44, 29.3%) attended exactly three visits (Fig 1).

176 **Table 2. ANC coverage outcomes of women enrolled <13 weeks of gestation**

| ANC outcomes             | N   | Median | IQR                |
|--------------------------|-----|--------|--------------------|
| Number of ANC visits     | 150 | 3      | 2-4                |
|                          | N   | n      | % (95% CI)         |
| At least one ANC visit   | 150 | 146    | 97.3 (93.1 – 99.2) |
| Four or more ANC visits  | 150 | 51     | 34.0 (26.9 – 41.9) |
| Eight or more ANC visits | 150 | 0      | 0                  |

177 *Note: ANC – antenatal care; CI – confidence interval; IQR – interquartile range*

178 **Fig 1. Distribution of ANC visits attended during pregnancy by women enrolled <13 weeks**  
 179 **of gestation.** Footnote: ANC – antenatal care

180 In the sensitivity analysis, which estimated ANC coverage in the missing data under several  
 181 scenarios, there was minimal change in the primary outcomes. Details can be found in the S2  
 182 File. Attendance of at least one ANC visit was 96.4% (95%CI 92.2 - 98.5) when assuming all  
 183 women who did not have a visit before being lost to follow-up never accessed ANC. Coverage of  
 184 four or more ANC visits ranged between 31.4% (95% CI 24.9 – 38.8%) and 32.9% (95%CI  
 185 26.2% - 40.3%) when assuming different ranges of ANC coverage among women who were lost  
 186 to follow-up.

187 Among the total population of 2069 women who enrolled at any time during pregnancy,  
188 coverage of at least one and four visits was lower (92.3% and 28.8% respectively), and the  
189 proportion of individuals who did not attend any ANC visit during pregnancy was higher (7.7%)  
190 than for the subsample of women enrolled <13 weeks (S4 File). There was an agreement close to  
191 50% between the number of self-reported visits at enrollment by study participants and the  
192 number of visits recorded in charts, suggesting recall bias among self-reported visits, which were  
193 predominantly the source of data for retrospective visits for the women who enrolled later in  
194 pregnancy (S1 File).

195 Retention in care, or continued engagement in ANC visits, was low. More than 80% of women  
196 were in ANC before week 16 of gestation, and that proportion decreased over time to 29% for  
197 the time window of  $\geq 36$  weeks (Fig 2). The largest drop-out from ANC occurred after the ANC3  
198 time window (28 to <36 weeks) when 70.3% of study participants who had a visit in that period  
199 did not return for a subsequent visit (Table 3).

200 **Table 3. Retention outcomes of women enrolled <13 weeks of gestation**

| Retention outcomes                  | N   | n  | % (95% CI)         |
|-------------------------------------|-----|----|--------------------|
| Lost after ANC 1 (<16 weeks)        | 121 | 16 | 13.2 (8.2 – 20.5)  |
| Lost after ANC 2 (16 to <28 weeks)  | 88  | 33 | 37.5 (28.1 – 48.0) |
| Lost after ANC 3 (28 to <36 weeks)* | 74  | 52 | 70.3 (59.0 – 79.5) |

201 \* *The denominator (N) excludes women who delivered before week 36 of gestation*

202 *Note: ANC – antenatal care; CI – confidence interval*

203 **Fig 2. Distribution of ANC visits by window time among women enrolled <13 weeks of**  
204 **gestation.** Footnote: ANC – antenatal care

205

## 206 **Discussion**

207 In this study we found that the coverage of at least one ANC visit during pregnancy is high and  
208 close to universal coverage, while coverage of four visits or more remains lower, close to one-  
209 third of the sample of women enrolled in the first trimester of pregnancy. No women in our study  
210 sample attended eight or more ANC visits. Our findings add valuable information and strengthen  
211 the available evidence on ANC coverage that in Ethiopia and other low-resource countries  
212 predominantly comes from cross-sectional studies. Longitudinal studies offer more complete  
213 sources of information including prospective repeated events, without depending on  
214 retrospective self-reported data. We only found cross-sectional studies available in northern  
215 Ethiopia to compare with our results. In the Birhan field site between 2018 and 2020, ANC  
216 coverage of at least one visit was higher than the results of the 2019 Demographic and Health  
217 Survey (DHS) in Amhara region [7, 13]. The Ethiopian mini DHS 2019 reports ANC coverage  
218 of pregnancies of the five past years prior to the survey [7]. Thus, it is possible that our coverage  
219 of at least one visit is greater due to more attention, policies, and health system resources  
220 dedicated to ANC in recent years. On the contrary, our estimates for a minimum of four ANC  
221 visits were lower than other studies in Amhara region [7, 13, 15], likely because of the rural  
222 nature of the Birhan field site and the potential recall and social desirability bias inherent to the  
223 cross-sectional estimates from available studies. No studies reported the coverage of eight or  
224 more ANC visits during pregnancy in Ethiopia. Since a minimum of eight ANC visits was not  
225 recommended until early 2022, poor coverage of this indicator was expected.

226 The most common indicator of timely use of ANC services is early ANC attendance, since ANC  
227 initiation in the first weeks of pregnancy allows health providers to screen women and conduct  
228 tests that are more effective to prevent future complications and assess risks in early weeks [21].  
229 Studies conducted in Ethiopia are not an exception and usually report early ANC attendance as

230 the only indicator of ANC timing [7, 13-15]. However, in order to achieve the recommended  
231 number of ANC visits, and to update the information collected in the first visit, timing of  
232 subsequent contacts is paramount. To our knowledge, there are no studies on the timing of ANC  
233 visits after initiation and on retention in care during pregnancy. Our study demonstrated a trend  
234 towards a progressive decrease of ANC attendance during pregnancy, with an especially low  
235 proportion of ANC visits after 36 weeks of gestation. The largest drop-out occurred during the  
236 window time of the third ANC visit (28 to <36 weeks). The reduced attendance over time may be  
237 due to known barriers to ANC utilization that could have a higher impact during the last weeks  
238 of pregnancy: negative previous experiences at health facilities, increased fatigue, pregnancy-  
239 related signs and symptoms, cultural norms, remoteness that hinders mobility, and lack of family  
240 support [6, 22, 23]. In addition, since some ANC components are mainly covered during earlier  
241 visits (e.g. complete medical and gynecologic history, ultrasound scan, HIV, hepatitis B and  
242 syphilis tests) [9], pregnant women may believe that late visits are less important.

243 High coverage and continued engagement in ANC are fundamental to reduce preventable  
244 pregnancy complications and improve perinatal mortality [3, 4, 24]. In addition, ANC provides  
245 the opportunity to be in frequent contact with health providers and improve trust in the health  
246 system [25]. ANC attendance is associated with higher rates of facility and skilled-attended  
247 delivery [26, 27], which in turn has been observed to decrease perinatal and neonatal mortality  
248 compared with home births [28].

249 Most available ANC coverage estimates from low-resource settings are generated with cross-  
250 sectional data and fully based on self-reported information. Our assessment of quality and  
251 reliability of self-reported data on ANC visits highlighted a disagreement between data reported  
252 by mothers and recorded data in health facility charts, suggesting that self-reports are biased and  
253 may decrease the accuracy of estimates. These results are similar to a validation cross-sectional

254 study conducted in rural China that showed large biases in self-reported data of ANC attendance  
255 before 12 weeks of gestation by using the ratio of self-reported over recorded coverage [10]. Our  
256 study minimized the potential inaccuracy caused by self-reported information and its inherent  
257 biases by leveraging a prospective longitudinal cohort study and restricting the study sample to  
258 individuals enrolled early in pregnancy. Our findings flag the possibility that many sources of  
259 ANC coverage carry biases and errors. In this context, it is necessary to further explore the use of  
260 prospectively collected data and utilize existing pregnancy cohorts to estimate ANC-related  
261 outcomes. It is necessary to advocate for increased resource allocation for open cohorts and  
262 longitudinal studies, and when those data sources are not available, new methodological  
263 approaches and mitigation strategies are critical to interpreting and using cross-section data for  
264 decision making [29].

265 Study results need to be interpreted in light of some limitations. Attrition, which is inherent to  
266 cohort studies, may have introduced selection bias to the results. However, in a sensitivity  
267 analysis, study findings remained consistent and similar across three different scenarios with lost  
268 to follow-up data. The small sample size of women who enrolled in the cohort before 13 weeks  
269 of gestation to estimate ANC coverage and retention indicators led to wide confidence intervals  
270 surrounding our estimates. This trade-off was made to minimize biases caused by self-reported  
271 information, leading to more accurate estimates. It was challenging to retrieve data from health  
272 facilities outside of the study catchment area, although we suspect the number of women seeking  
273 care at facilities outside the catchment were few. While we did not observe any differences in  
274 baseline characteristics or timing of ANC between women who enrolled <13 weeks of gestation  
275 and those enrolled later in pregnancy, it is possible that there exist unmeasured characteristics  
276 between the cohort of women who enrolled <13 weeks compared to the entire cohort sample.

277 Despite excellent coverage of one or more ANC visits, adequate coverage of the previously  
278 recommended four or more ANC visits has not been reached yet in Ethiopia. The recent launch  
279 in 2022 of the National ANC guideline to achieve eight or more ANC visits creates an  
280 opportunity to continue devoting efforts and resources to increasing adherence and retention of  
281 pregnant women in ANC all over the country [9]. As health system and health professionals  
282 target adherence to the new ANC guideline, the number of visits attended by pregnant women  
283 may potentially experience an increase. As National ANC guidelines aligned with the World  
284 Health Organization (WHO) recommendations are being rolled out in Ethiopia and in other low-  
285 resource countries, longitudinal studies play an important role in the evaluation and monitoring  
286 of implementation through accurate and reliable metrics.

## 287 **Conclusion**

288 This study presents a rigorous methodological approach to accurately estimate ANC coverage,  
289 leveraging longitudinal data from a pregnancy and birth cohort in Amhara region, Ethiopia.  
290 Despite the high proportion of pregnant women who accessed ANC at least once in the study  
291 area, further efforts are needed to enhance access to more ANC visits and retain women in care  
292 during pregnancy to achieve the global WHO target of eight ANC visits [1]. Furthermore, it is  
293 essential to identify and mitigate the barriers that contribute to the large proportion of women  
294 who discontinue ANC follow-up after initial ANC visits. Longitudinal prospective data  
295 collection should be promoted to minimize the general reliance on self-reports of ANC  
296 attendance that could lead to biased estimates and to obtain useful metrics of visits timing to  
297 describe patterns of retention in care.

## 298 **Acknowledgements**

299 We thank all the mothers and children who participated in the study (Birhan HDSS and Birhan  
300 Cohort) and the community of the Birhan field site. We also thank data collectors, supervisors,  
301 coordinators, and the HaSET team for their contributions.

302

## 303 **References**

- 304 1. WHO. WHO recommendations on antenatal care for a positive pregnancy experience.  
305 Geneva; 2016.
- 306 2. Croft TN, Marshall AMJ, Allen CK. Guide to DHS Statistics. Rockville, Maryland, USA:  
307 ICF; 2018.
- 308 3. Carroli G, Rooney C, Villar J. How effective is antenatal care in preventing maternal  
309 mortality and serious morbidity? An overview of the evidence. *Paediatr Perinat Epidemiol*.  
310 2001;15 Suppl 1:1-42.
- 311 4. Doku DT, Neupane S. Survival analysis of the association between antenatal care  
312 attendance and neonatal mortality in 57 low- and middle-income countries. *Int J Epidemiol*.  
313 2017;46(5):1668-77.
- 314 5. The World Bank Group. Ethiopia. Overview 2022. Available from:  
315 <https://www.worldbank.org/en/country/ethiopia/overview>.
- 316 6. Tsegaye S, Yibeltal K, Zelealem H, Worku W, Demissie M, Worku A, et al. The  
317 unfinished agenda and inequality gaps in antenatal care coverage in Ethiopia. *BMC Pregnancy*  
318 *Childbirth*. 2022;22(1):82.



- 319 7. The DHS Program. Ethiopian Mini Demographic and Health Survey 2019. Maryland,  
320 USA; 2021.
- 321 8. Ethiopian Ministry of Health. Health Sector Transformation Plan II. 2021.
- 322 9. Ethiopian Ministry of Health. National Antenatal Care Guideline. 2022.
- 323 10. Liu L, Li M, Yang L, Ju L, Tan B, Walker N, et al. Measuring coverage in MNCH: a  
324 validation study linking population survey derived coverage to maternal, newborn, and child  
325 health care records in rural China. *PloS one*. 2013;8(5):e60762.
- 326 11. Ayalew TW, Nigatu AM. Focused antenatal care utilization and associated factors in  
327 Debre Tabor Town, northwest Ethiopia, 2017. *BMC Res Notes*. 2018;11(1):819.
- 328 12. Ftwi M, Gebretsadik GG, Berhe H, Haftu M, Gebremariam G, Tesfau YB. Coverage of  
329 completion of four ANC visits based on recommended time schedule in Northern Ethiopia: A  
330 community-based cross-sectional study design. *PloS one*. 2020;15(8):e0236965.
- 331 13. Shibre G, Mekonnen W. Socio-economic inequalities in ANC attendance among mothers  
332 who gave birth in the past 12 months in Debre Brehan town and surrounding rural areas, North  
333 East Ethiopia: a community-based survey. *Reprod Health*. 2019;16(1):99.
- 334 14. Shiferaw K, Mengistie B, Gobena T, Dheresa M, Seme A. Adequacy and timeliness of  
335 antenatal care visits among Ethiopian women: a community-based panel study. *BMJ Open*.  
336 2021;11(12):e053357.
- 337 15. Tizazu MA, Asefa EY, Muluneh MA, Haile AB. Utilizing a Minimum of Four Antenatal  
338 Care Visits and Associated Factors in Debre Berhan Town, North Shewa, Amhara, Ethiopia,  
339 2020. *Risk Manag Healthc Policy*. 2020;13:2783-91.
- 340 16. Umer A, Zinsstag J, Schelling E, Tschopp R, Hattendorf J, Osman K, et al. Antenatal care  
341 and skilled delivery service utilisation in Somali pastoral communities of Eastern Ethiopia. *Trop*  
342 *Med Int Health*. 2020;25(3):328-37.

- 343 17. Bekele D, Hunegnaw BM, Bekele C, Van Wickle K, Tadesse F, Goddard FGB, et al.  
344 Cohort Profile: The Birhan Health and Demographic Surveillance System. *Int J Epidemiol.*  
345 2022;51(2):e39-e45.
- 346 18. Chan GJ, Hunegnaw BM, Van Wickle K, Mohammed Y, Hunegnaw M, Bekele C, et al.  
347 Birhan maternal and child health cohort: a study protocol. *BMJ Open.* 2021;0(e049692.).
- 348 19. Chan GJ, Goddard FGB, Hunegnaw BM, Mohammed Y, Hunegnaw M, Haneuse S, et al.  
349 Estimates of Stillbirths, Neonatal Mortality, and Medically Vulnerable Live Births in Amhara,  
350 Ethiopia. *JAMA Netw Open.* 2022;5(6):e2218534.
- 351 20. Brown DB, Cai TT, DasGupta A. Internal estimation for a binomial proportion.  
352 *Statistical Science.* 2001;16:101-33.
- 353 21. Moller AB, Petzold M, Chou D, Say L. Early antenatal care visit: a systematic analysis of  
354 regional and global levels and trends of coverage from 1990 to 2013. *Lancet Glob Health.*  
355 2017;5(10):e977-e83.
- 356 22. Downe S, Finlayson K, Tuncalp O, Gulmezoglu AM. Provision and uptake of routine  
357 antenatal services: a qualitative evidence synthesis. *Cochrane Database Syst Rev.*  
358 2019;6(6):CD012392.
- 359 23. Simkhada B, Teijlingen ER, Porter M, Simkhada P. Factors affecting the utilization of  
360 antenatal care in developing countries: systematic review of the literature. *J Adv Nurs.*  
361 2008;61(3):244-60.
- 362 24. Dowswell T, Carroli G, Duley L, Gates S, Gulmezoglu AM, Khan-Neelofur D, et al.  
363 Alternative versus standard packages of antenatal care for low-risk pregnancy. *Cochrane*  
364 *Database Syst Rev.* 2015;2015(7):CD000934.
- 365 25. Kabakyenga JK, Ostergren PO, Turyakira E, Pettersson KO. Influence of birth  
366 preparedness, decision-making on location of birth and assistance by skilled birth attendants  
367 among women in south-western Uganda. *PloS one.* 2012;7(4):e35747.

- 368 26. Manyeh AK, Akpakli DE, Kukula V, Ekey RA, Narh-Bana S, Adjei A, et al. Socio-  
369 demographic determinants of skilled birth attendant at delivery in rural southern Ghana. BMC  
370 Res Notes. 2017;10(1):268.
- 371 27. Nahar MT, Anik SMF, Islam MA, Islam SMS. Individual and community-level factors  
372 associated with skilled birth attendants during delivery in Bangladesh: A multilevel analysis of  
373 demographic and health surveys. PloS one. 2022;17(6):e0267660.
- 374 28. Feng XL, Guo S, Hipgrave D, Zhu J, Zhang L, Song L, et al. China's facility-based birth  
375 strategy and neonatal mortality: a population-based epidemiological study. Lancet.  
376 2011;378(9801):1493-500.
- 377 29. Bryce J, Arnold F, Blanc A, Hancioglu A, Newby H, Requejo J, et al. Measuring  
378 coverage in MNCH: new findings, new strategies, and recommendations for action. PLoS Med.  
379 2013;10(5):e1001423.

380

## 381 **Supporting information**

382 **S1 File. Quality and reliability assessment of self-reports.** It includes:

- 383 - S1 Table. Distribution of recorded visits that occurred before enrollment and self-  
384 reported visits at enrollment for individuals with at least one recorded visit before  
385 enrollment

386 **S2 File. Sensitivity analysis.** It includes:

- 387 - S2 Table. Sensitivity analysis: scenarios of ANC coverage of four or more visits

388 **S3 File. Comparability assessment.** It includes:

- 389 - S3 Table. Timing of ANC visits across different gestational ages at enrollment

390 **S4 File. ANC coverage in the entire Birhan Cohort.** It includes:

- 391 - S1 Fig. Distribution of ANC visits attended during pregnancy by women enrolled in the
- 392 Birhan Cohort
- 393 - S4 Table. ANC coverage outcomes of women enrolled in the Birhan Cohort

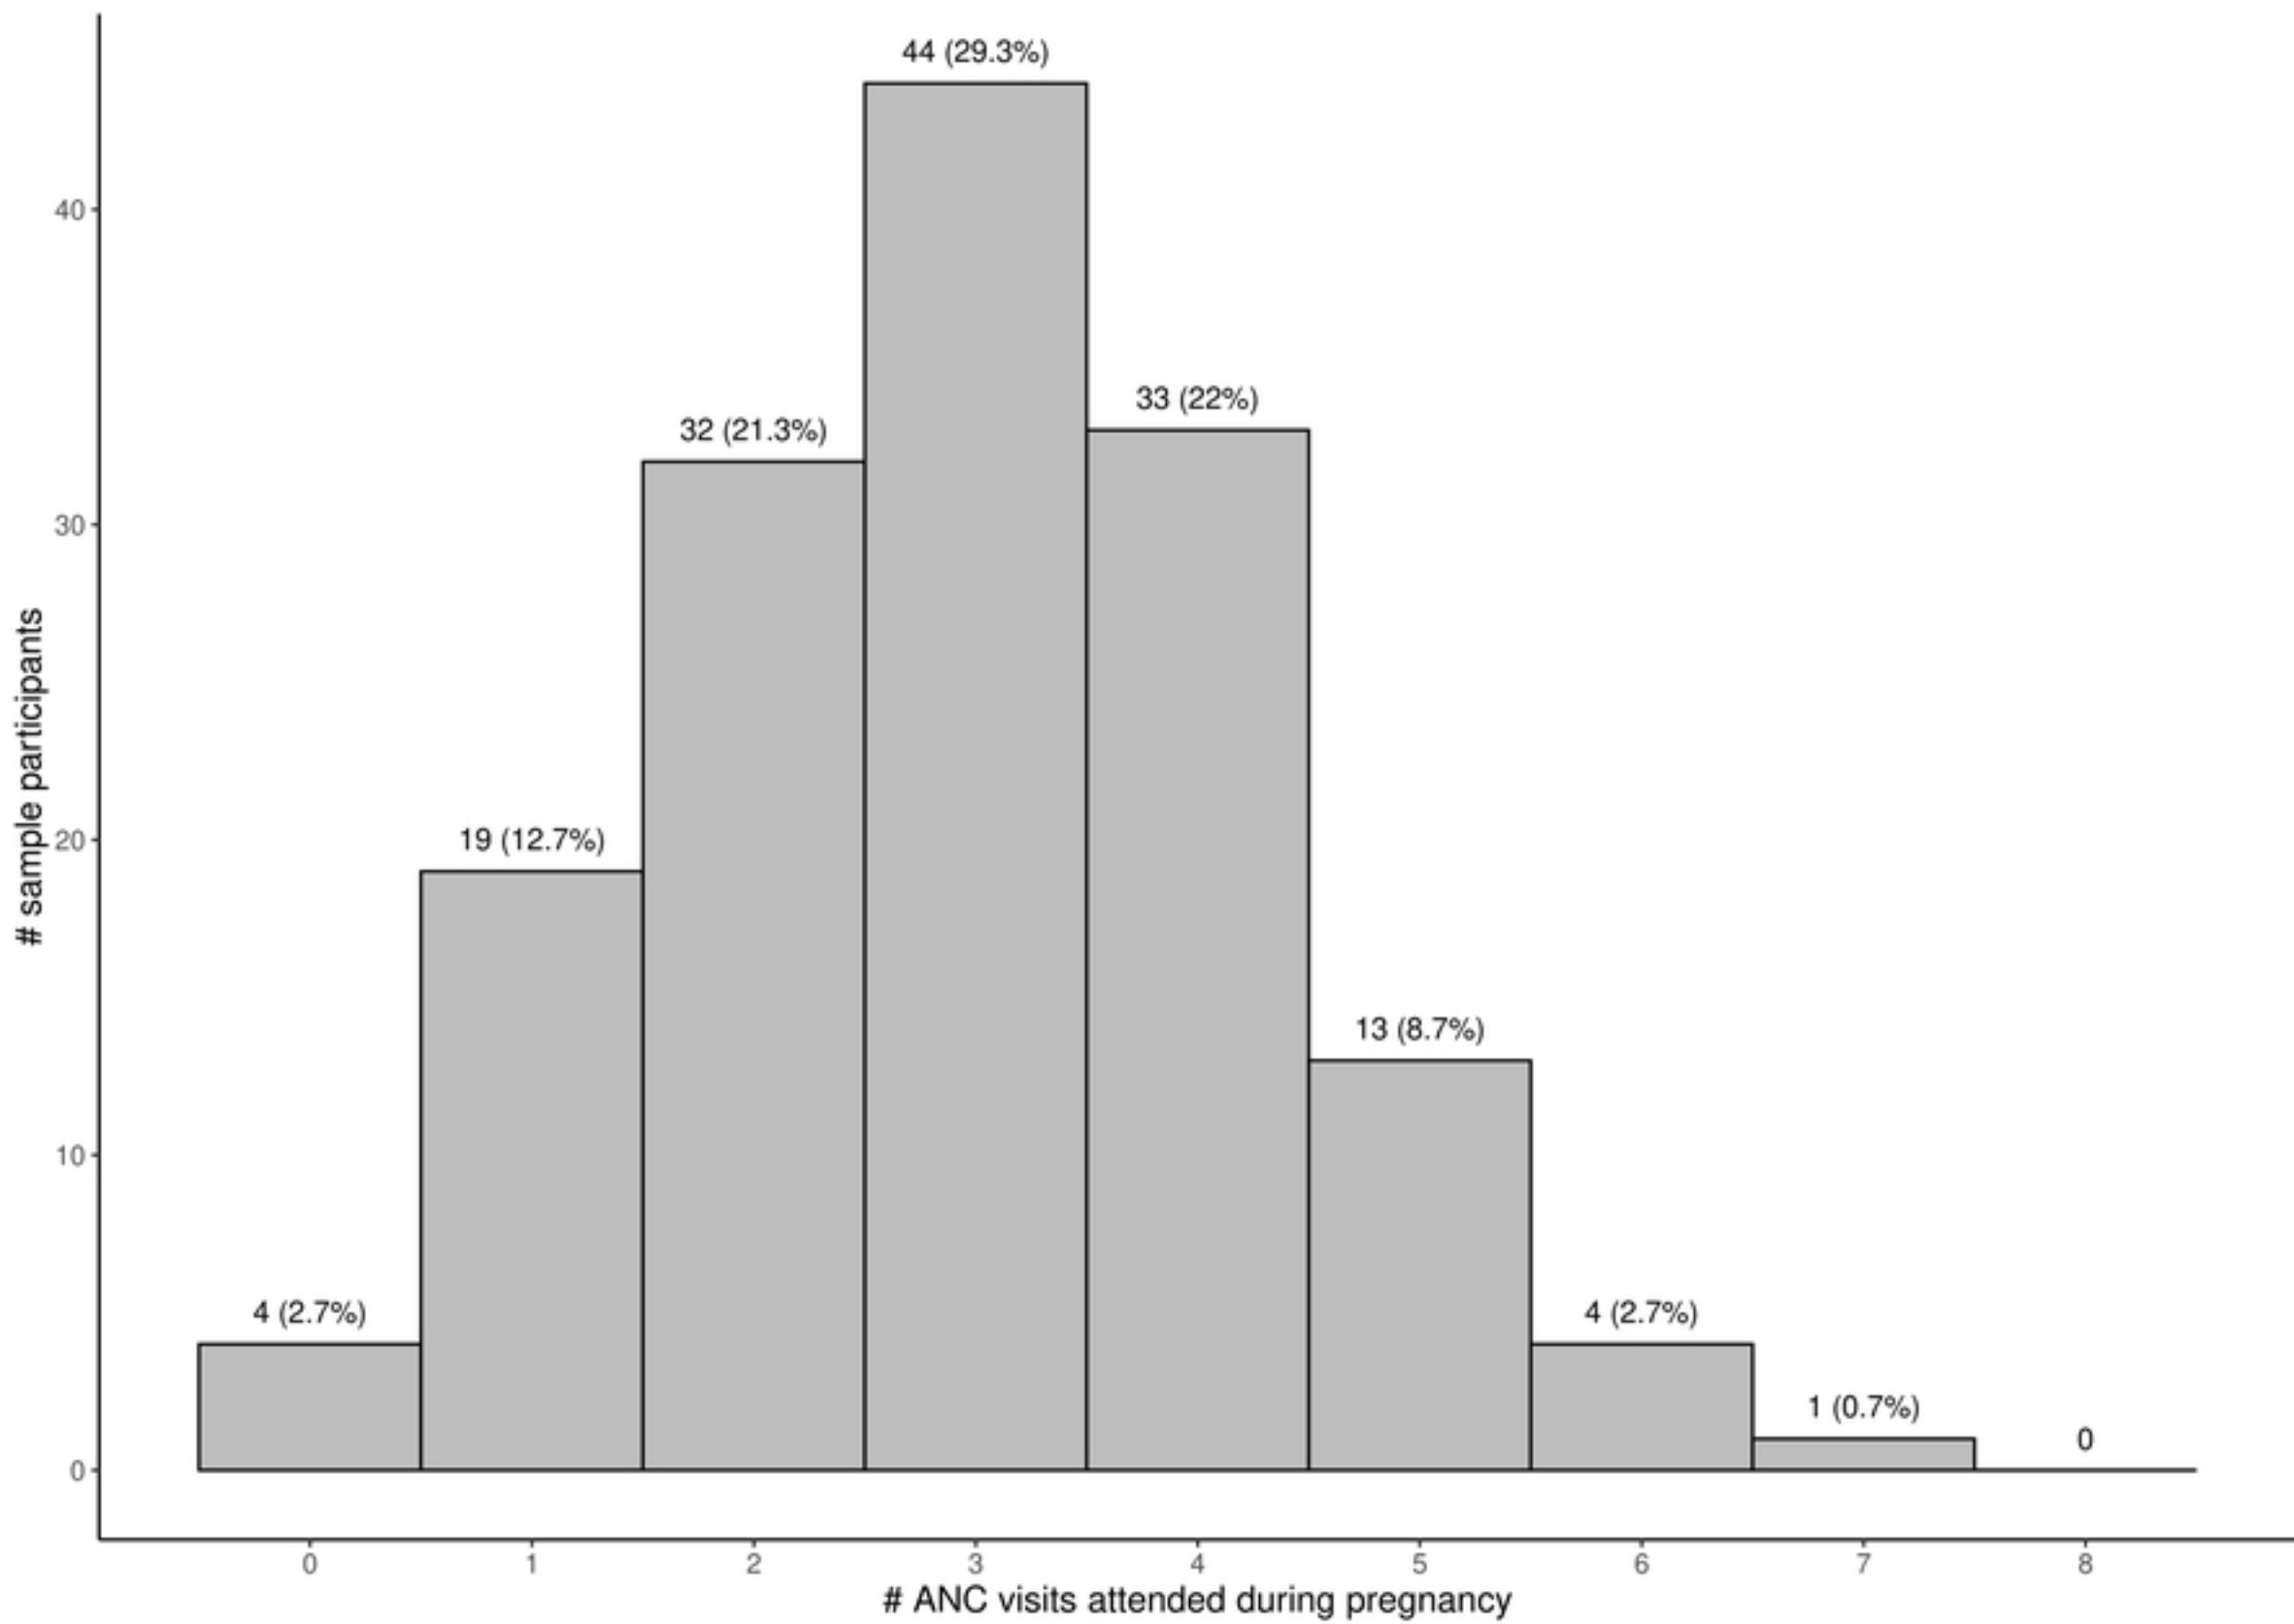

Figure 1

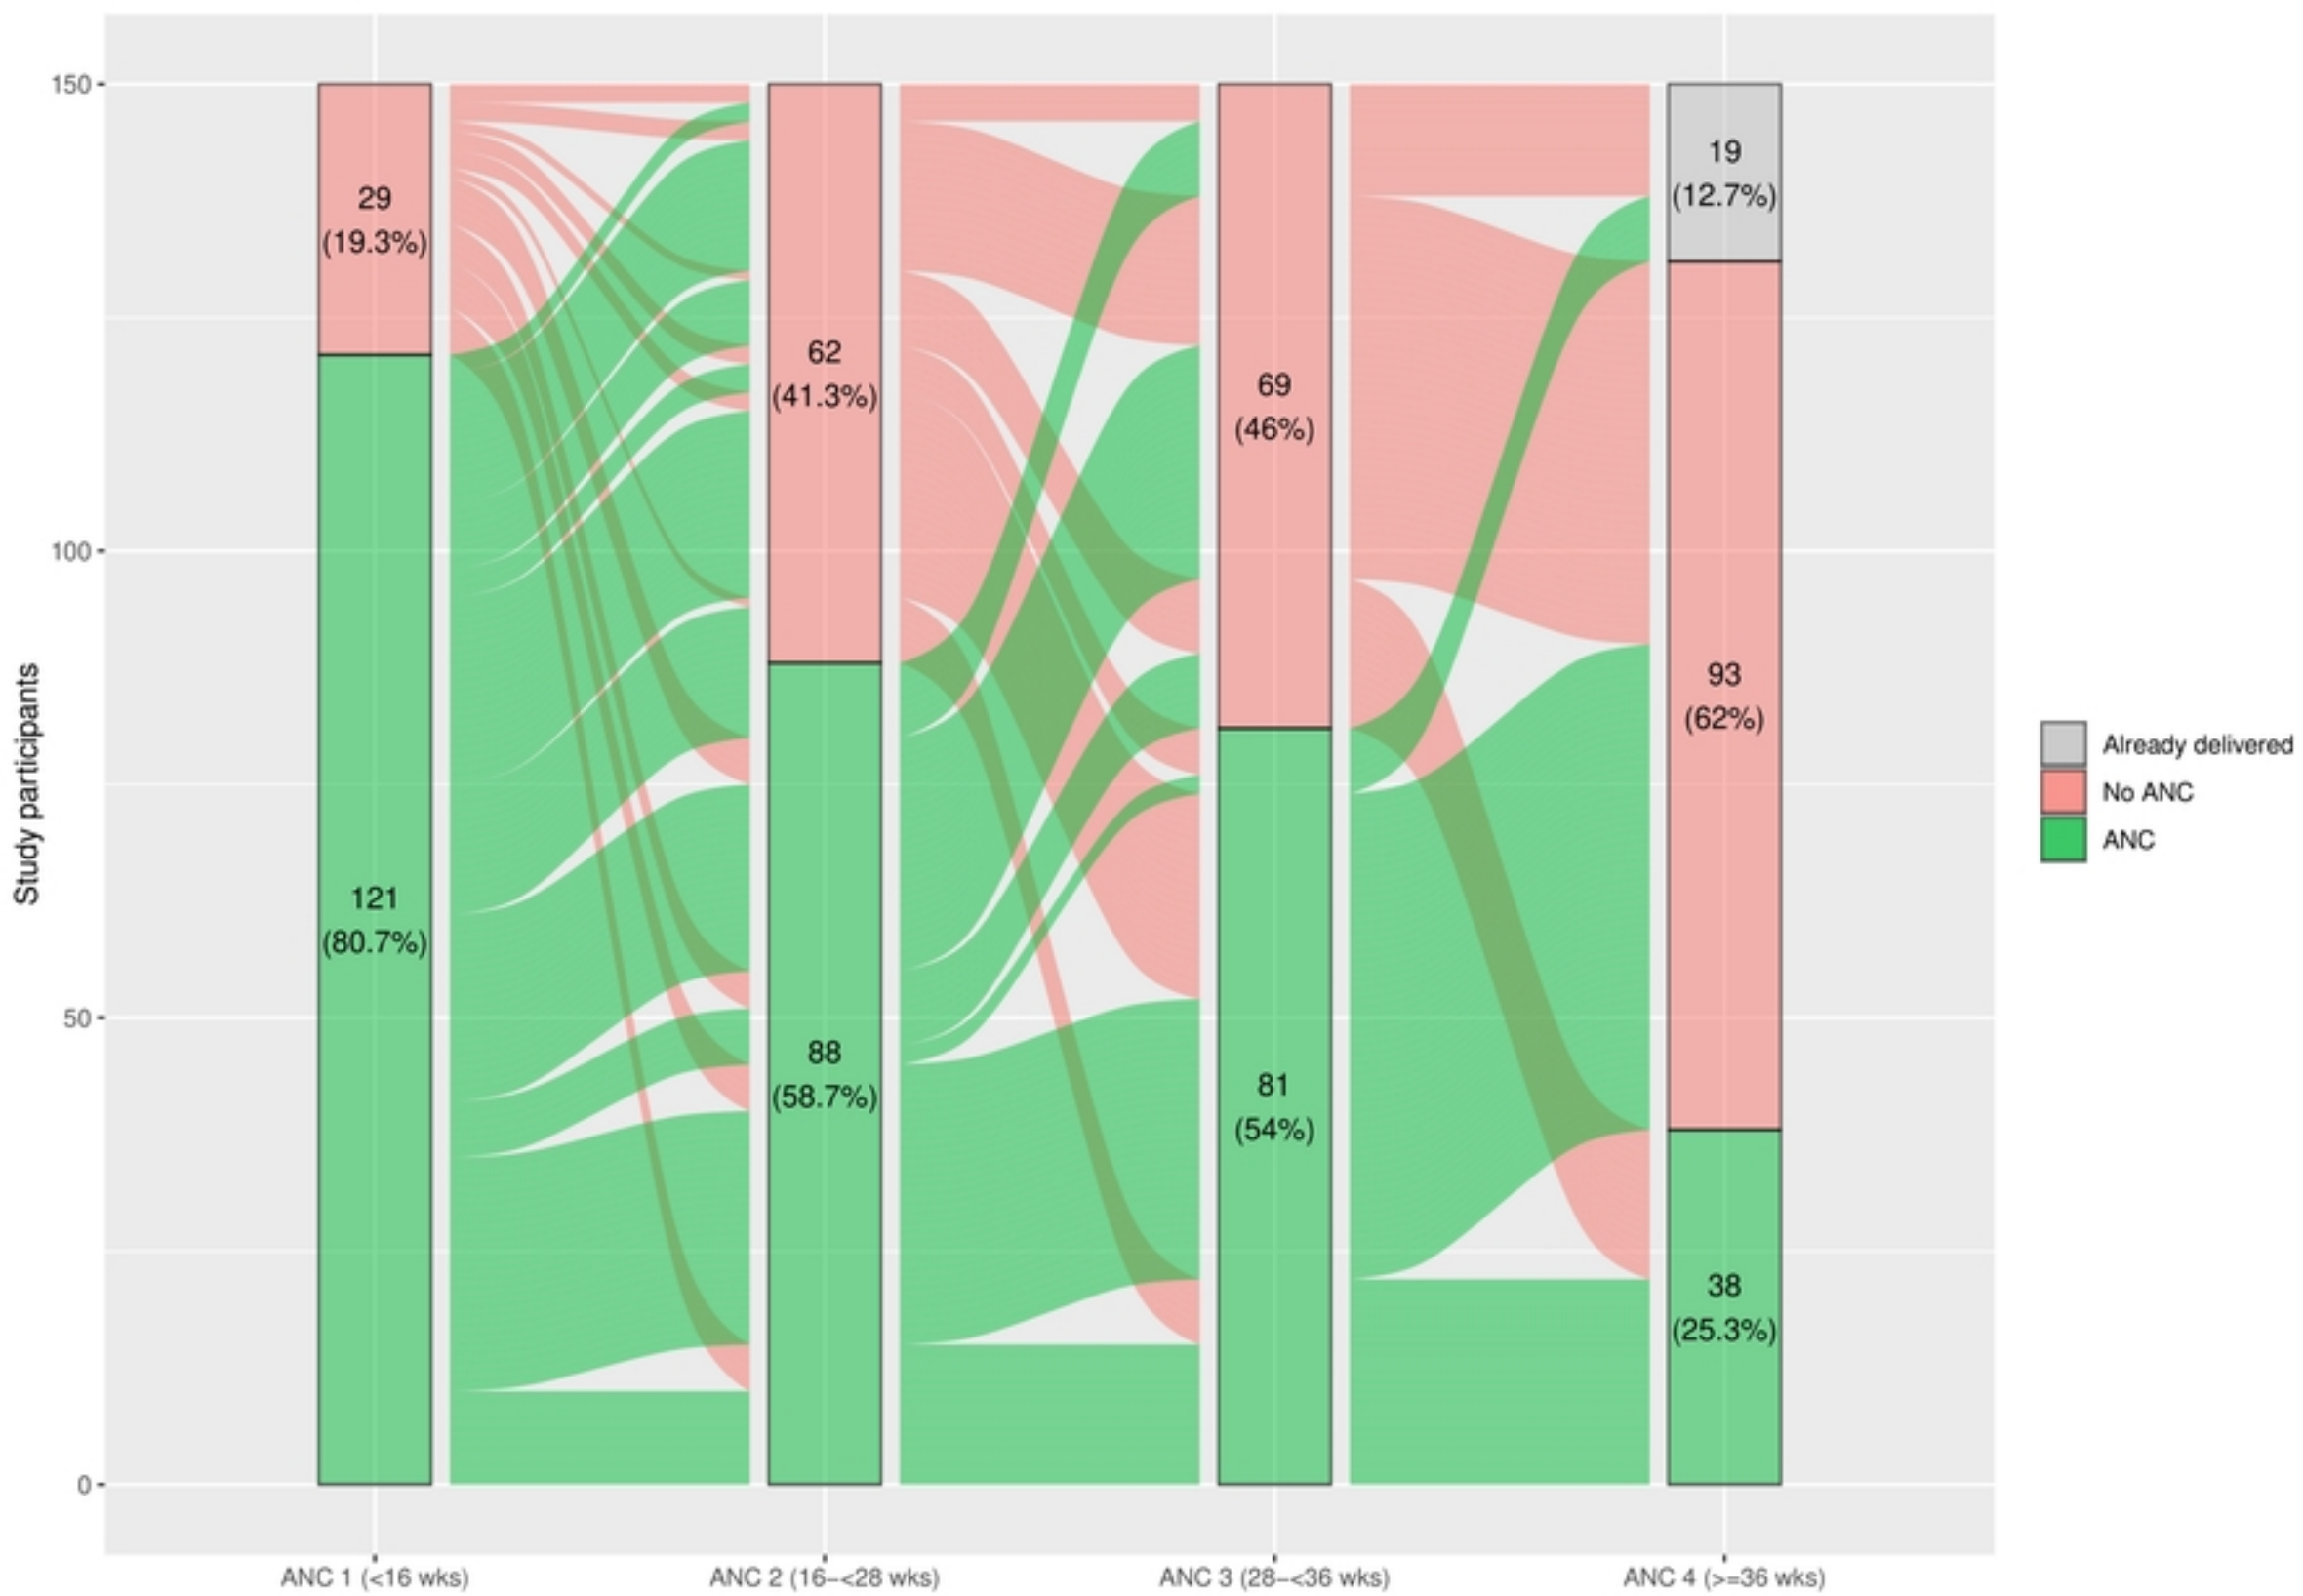

Figure 2
